# Supplementary material for: Quality Evaluation of Dietary Supplements for Weight Loss Based on Garcinia cambogia
Source: MDPI journal article supplement (doi:10.3390/nu14153077), 2022-07-27
Supplement: s1 [file s1]

Table S1. Characteristics and composition (data per formulation unit) declared on labels of *G. cambogia* food supplements under study.

| Code    | Type     | <i>G. cambogia</i> amount<br>(-)-HCA content)                                                                     | Other declared constituents                                                                                  | Acquisition                 |
|---------|----------|-------------------------------------------------------------------------------------------------------------------|--------------------------------------------------------------------------------------------------------------|-----------------------------|
| GCFS1A* | Tablets  | 416 mg <i>G. cambogia</i><br>(≥ 60% (-)-HCA)                                                                      | 20.625 mg choline, 0.35 mg<br>vitamin B6, 20 mg vitamin C,<br>10 µg chrome                                   | Herbal shop                 |
| GCFS1B* | Tablets  | 416 mg <i>G. cambogia</i><br>(≥ 60% (-)-HCA)                                                                      | 20.625 mg choline, 0.35 mg<br>vitamin B <sub>6</sub> , 0.20 mg vitamin C,<br>10 µg chrome                    | Herbal shop                 |
| GCFS2   | Capsules | 250 mg <i>G. cambogia</i> extract<br>(60% (-)-HCA)                                                                | -                                                                                                            | Herbal shop                 |
| GCFS3   | Capsules | 401 mg <i>G. cambogia</i> extract<br>(50% (-)-HCA)                                                                | -                                                                                                            | Pharmacy                    |
| GCFS4   | Capsules | 350 mg <i>G. cambogia</i> dry<br>extract (50% (-)-HCA)                                                            | 60 mg vitamin C, 40 µg<br>chrome                                                                             | Supermarket                 |
| GCFS5   | Capsules | 350 mg <i>G. cambogia</i> fruit<br>dry extract<br>(175 mg (-)-HCA)                                                | Maltodextrin,<br>magnesium stearate                                                                          | Supermarket                 |
| GCFS6   | Capsules | 300 mg <i>G. cambogia</i> dry<br>extract<br>(60 % (-)-HCA, 180 mg)                                                | Cellulose                                                                                                    | Online                      |
| GCFS7   | Capsules | 300 mg Garcinia dry extract<br>(60 % (-)-HCA)                                                                     | Mannitol, cellulose,<br>magnesium stearate and silicon<br>dioxide                                            | Online                      |
| GCFS8   | Capsules | 500 mg <i>G. cambogia</i> fruit<br>dry extract<br>(60% (-)-HCA)                                                   | Magnesium stearate and silicon<br>dioxide                                                                    | Supermarket                 |
| GCFS9   | Tablets  | 1200 mg <i>G. cambogia</i> fruit<br>dry extract<br>(60% (-)-HCA, 720 mg)                                          | Magnesium stearate and<br>cellulose, cornstarch                                                              | Herbal shop                 |
| GCFS10  | Capsules | 1500 mg <i>G. cambogia</i> fruit<br>extract<br>(60% (-)-HCA)                                                      | Cellulose, magnesium stearate,<br>silicon dioxide                                                            | Online                      |
| GCFS11  | Tablets  | Garcinia dry extract (fruit)<br>(60% (-)-HCA, 360 mg )                                                            | Cellulose, maltodextrins,<br>calcium phosphate, magnesium<br>stearate                                        | Online                      |
| GCFS12  | Capsules | 500 mg <i>G. cambogia</i> fruit<br>rind extract<br>(60% (-)-HCA)                                                  | Magnesium stearate, silicon<br>dioxide                                                                       | Online                      |
| GCFS13  | Capsules | 1000 mg <i>G. cambogia</i><br>extract                                                                             | Hydroxypropylmethyl<br>cellulose, Magnesium stearate                                                         | Online                      |
| GCFS14  | Capsules | 500 mg <i>G. cambogia</i> pure<br>extract                                                                         | Cellulose, magnesium stearate,<br>silicon dioxide                                                            | Online                      |
| GCFS15  | Tablets  | 2000 mg per 2 caplets, <i>G.</i><br><i>cambogia</i> fruit dry extract.<br>(60% (-)-HCA, 1200 mg per<br>2 caplets) | Sodium carboxymethyl<br>cellulose, cellulose, dicalcium<br>phosphate, magnesium stearate,<br>silicon dioxide | Online                      |
| GCFS16  | Capsules | <i>G. cambogia</i> 4:1, pure<br>natural source<br>(60% (-)-HCA)                                                   | Calcium carbonate,<br>hydroxypropylmethyl<br>cellulose                                                       | Online                      |
| GCFS17  | Powder   | <i>G. cambogia</i> dry extract<br>61.60% (-)-HCA                                                                  | -                                                                                                            | Biotechnological<br>company |

\*Supplements from the same brand but of different production batches

**Table S2.** Analytical parameters for the validation of the LC-UV method for (-)-HCA determination ( $n = 5$ ).

|                                      |                                               |
|--------------------------------------|-----------------------------------------------|
| Calibration curve                    | $y = 146147377x - 1234424$ ( $R^2 = 0.9991$ ) |
| Linear range ( $\text{mg mL}^{-1}$ ) | 0.05–1                                        |
| Repeatability (RSD %)                | 1.45                                          |
| Intermediate precision (RSD %)       | 1.17                                          |
| <i>LOD</i> ( $\text{mg mL}^{-1}$ )   | 0.140 (SD 0.005)                              |
| <i>LOQ</i> ( $\text{mg mL}^{-1}$ )   | 0.45 (SD 0.015)                               |
| Recovery (%)                         |                                               |
| GFS12 + 0.05 mg                      | 100.9 (SD 1.3)                                |
| GFS12 + 0.15 mg                      | 101.2 (SD 2.4)                                |
| GFS12 + 0.25 mg                      | 101.3 (SD 1.7)                                |

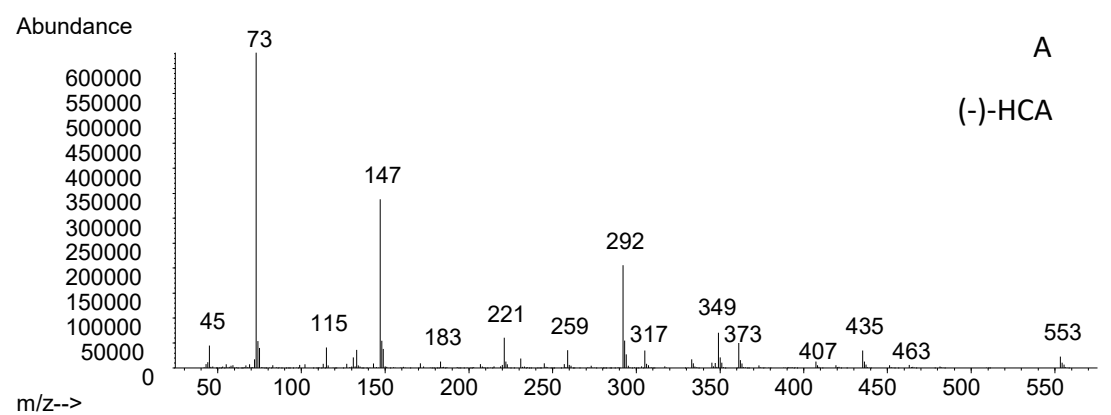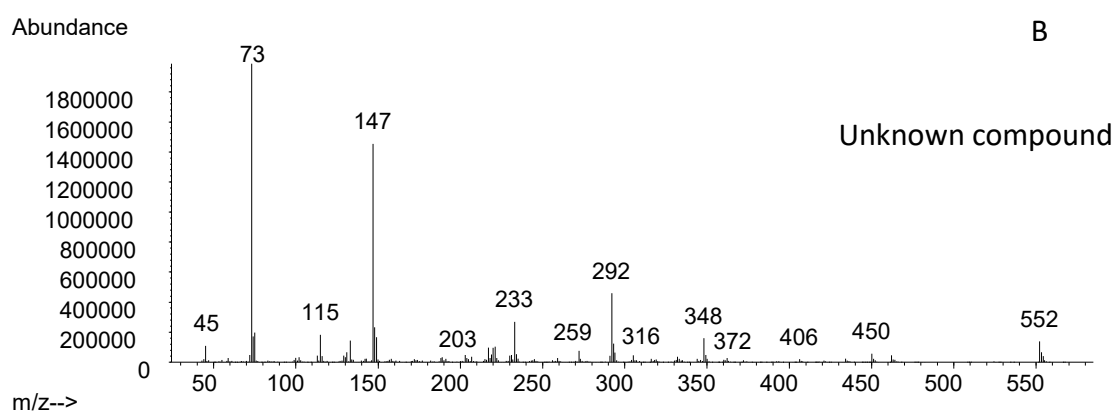

Figure S1. Mass spectra of derivatized (-)-HCA (A) and an unknown compound (B) eluting by gas chromatography at  $t_R$  9.63 min found in kudam puli extracts.
